# Supplementary material
Source: PubMed Central journal article supplement (PMC5710622)
Supplement: jamapediatr-171-948-s001.pdf [file jamapediatr-171-948-s001.pdf]

## Supplementary Online Content

Lange S, Probst C, Gmel G, Rehm J, Burd L, Popova S. Global prevalence of fetal alcohol spectrum disorder among children and youth: a systematic review and meta-analysis. *JAMA Pediatr*. Published on August 21, 2017.  
doi:10.1001/jamapediatrics.2017.1919

**eTable 1.** Keywords Used in the Comprehensive Systematic Literature Search

**eTable 2.** Diagnostic Breakdown of FASD in the Identified Studies

**eTable 3.** Critical Appraisal of the Identified Studies Reporting on the Prevalence of FASD Among Children and Youth in the General Population

**eTable 4.** Prevalence of FASD Among Children and Youth in the General Population by Country and WHO Region in 2012

**eTable 5.** Pooled Prevalence of FASD Among Children and Youth in the General Population and the Results of the Heterogeneity and Publication Bias Tests by Country and WHO Region

**eTable 6.** Comparison of the Prevalence of FASD Among Special Populations, Based on Select Studies, to the Global Prevalence Among Children and Youth in the General Population

**eMethods.** Estimation of the Quotient of the Average Number of Women Who Consumed Alcohol During Pregnancy per 1 Case of FASD

**eFigure 1.** Schematic Diagram Depicting the Search Strategy Used

**eFigure 2.** Forest Plot of the Prevalence of FASD Among Children and Youth in the General Population in Australia, Croatia, France, Italy, South Africa, and the United States

This supplementary material has been provided by the authors to give readers additional information about their work.

---

**eTable 1. Keywords Used in the Comprehensive Systematic Literature Search**

---

**Keywords**

(1) epidemiolog\*, frequenc\*, incidence\*, morbidity\*, occurren\*, prevalence\*, probability, rate\*, OR statistic\*; AND (2) alcohol\* embryopath\*, alcohol\* related\* neurodevelopmental\* disorder\*, alcohol\* related\* birth defect\*, arnd, arbd, fetal\* alcohol\* effect\*, fae, fas, fasd, fetal alcohol syndrome\*, fetal alcohol spectrum disorder\*, foetal\* alcohol\* effect, foetal\* alcohol syndrome\*, foetal\* alcohol spectrum disorder\*, pfas, partial fetal alcohol syndrome, partial foetal alcohol syndrome, prenatal\* alcohol expos\*, OR pre-natal\* alcohol expos\*; AND (3) cohort stud\*, cross\* sectional stud\*, prospective cohort stud\* OR retrospective cohort stud\*

---

**eTable 2. Diagnostic Breakdown of FASD in the Identified Studies**

| <b>Diagnostic Breakdown of FASD</b>      | <b>Number of Studies</b> |
|------------------------------------------|--------------------------|
| ARBD + ARND + FAS + pFAS                 | 4                        |
| ARND + FAS + pFAS                        | 3                        |
| FAS + pFAS                               | 9                        |
| FAS + other-FASD (not further specified) | 6                        |
| FASD (breakdown not specified)           | 2                        |

Abbreviations: ARBD, alcohol-related birth defects; ARND, alcohol-related neurodevelopmental disorder, FAS: fetal alcohol syndrome; FASD, fetal alcohol spectrum disorder; pFAS, partial fetal alcohol syndrome.

**eTable 3. Critical Appraisal of the Identified Studies Reporting on the Prevalence of FASD Among Children and Youth in the General Population**

| Reference                          | 1. Was the sample representative of the target population? |                | 2. Were study participants recruited in an appropriate way? |                | 3. Was the sample size adequate (n≥300)? |                | 4. Were the study subjects and the setting described in detail? |                | 5. Was the data analysis conducted with sufficient coverage of the identified sample? |                | 6. Were objective, standard criteria used for ascertaining FASD? |                | 7. Was the statistical analysis appropriate? |                |
|------------------------------------|------------------------------------------------------------|----------------|-------------------------------------------------------------|----------------|------------------------------------------|----------------|-----------------------------------------------------------------|----------------|---------------------------------------------------------------------------------------|----------------|------------------------------------------------------------------|----------------|----------------------------------------------|----------------|
|                                    | Yes                                                        | No/<br>Unclear | Yes                                                         | No/<br>Unclear | Yes                                      | No/<br>Unclear | Yes                                                             | No/<br>Unclear | Yes                                                                                   | No/<br>Unclear | Yes                                                              | No/<br>Unclear | Yes                                          | No/<br>Unclear |
| Asante & Nelms-Matzke <sup>1</sup> | X                                                          |                | X                                                           |                | X                                        |                | X                                                               |                | X                                                                                     |                | X                                                                |                | X                                            |                |
| Barr & Streissguth <sup>2</sup>    | X                                                          |                | X                                                           |                | X                                        |                | X                                                               |                | X                                                                                     |                | X                                                                |                | X                                            |                |
| Bloch et al. <sup>3</sup>          | X                                                          |                | X                                                           |                | X                                        |                | X                                                               |                | X                                                                                     |                | X                                                                |                | X                                            |                |
| Chersich et al. <sup>4</sup>       | X                                                          |                | X                                                           |                | X                                        |                | X                                                               |                | X                                                                                     |                | X                                                                |                | X                                            |                |
| Clarren et al. <sup>5</sup>        | X                                                          |                | X                                                           |                | X                                        |                |                                                                 | X              |                                                                                       | X              |                                                                  | X              |                                              | X              |
| Dehaene et al. <sup>6</sup>        | X                                                          |                |                                                             |                | X                                        |                | X                                                               |                |                                                                                       |                | X                                                                |                | X                                            |                |
| Elgen et al. <sup>7</sup>          | X                                                          |                | X                                                           |                | X                                        |                | X                                                               |                | X                                                                                     |                | X                                                                |                | X                                            |                |
| Elliott et al. <sup>8</sup>        | X                                                          |                | X                                                           |                | X                                        |                | X                                                               |                | X                                                                                     |                | X                                                                |                | X                                            |                |
| Harris & Bucens <sup>9</sup>       | X                                                          |                | X                                                           |                | X                                        |                | X                                                               |                | X                                                                                     |                | X                                                                |                | X                                            |                |
| Hingson et al. <sup>10</sup>       | X                                                          |                | X                                                           |                | X                                        |                | X                                                               |                | X                                                                                     |                | X                                                                |                | X                                            |                |
| May et al. <sup>11</sup>           | X                                                          |                | X                                                           |                |                                          | X              | X                                                               |                | X                                                                                     |                | X                                                                |                | X                                            |                |
| May et al. <sup>12</sup>           | X                                                          |                | X                                                           |                | X                                        |                | X                                                               |                | X                                                                                     |                | X                                                                |                | X                                            |                |
| May et al. <sup>13</sup>           | X                                                          |                | X                                                           |                | X                                        |                | X                                                               |                | X                                                                                     |                | X                                                                |                | X                                            |                |
| May et al. <sup>14</sup>           | X                                                          |                | X                                                           |                | X                                        |                | X                                                               |                | X                                                                                     |                | X                                                                |                | X                                            |                |
| May et al. <sup>15</sup>           | X                                                          |                | X                                                           |                | X                                        |                | X                                                               |                | X                                                                                     |                | X                                                                |                | X                                            |                |
| May et al. <sup>16</sup>           | X                                                          |                | X                                                           |                | X                                        |                | X                                                               |                | X                                                                                     |                | X                                                                |                | X                                            |                |
| Olivier et al. <sup>17</sup>       | X                                                          |                | X                                                           |                |                                          | X              | X                                                               |                | X                                                                                     |                | X                                                                |                | X                                            |                |
| Petković & Barišić <sup>18</sup>   | X                                                          |                | X                                                           |                |                                          | X              | X                                                               |                | X                                                                                     |                | X                                                                |                | X                                            |                |
| Petković &                         | X                                                          |                | X                                                           |                | X                                        |                | X                                                               |                | X                                                                                     |                | X                                                                |                | X                                            |                |

| Reference                       | 1. Was the sample representative of the target population? |                | 2. Were study participants recruited in an appropriate way? |                | 3. Was the sample size adequate (n≥300)? |                | 4. Were the study subjects and the setting described in detail? |                | 5. Was the data analysis conducted with sufficient coverage of the identified sample? |                | 6. Were objective, standard criteria used for ascertaining FASD? |                | 7. Was the statistical analysis appropriate? |                |
|---------------------------------|------------------------------------------------------------|----------------|-------------------------------------------------------------|----------------|------------------------------------------|----------------|-----------------------------------------------------------------|----------------|---------------------------------------------------------------------------------------|----------------|------------------------------------------------------------------|----------------|----------------------------------------------|----------------|
|                                 | Yes                                                        | No/<br>Unclear | Yes                                                         | No/<br>Unclear | Yes                                      | No/<br>Unclear | Yes                                                             | No/<br>Unclear | Yes                                                                                   | No/<br>Unclear | Yes                                                              | No/<br>Unclear | Yes                                          | No/<br>Unclear |
| Barišić <sup>19</sup>           |                                                            |                |                                                             |                |                                          |                |                                                                 |                |                                                                                       |                |                                                                  |                |                                              |                |
| Poitra et al. <sup>20</sup>     | X                                                          |                | X                                                           |                | X                                        |                | X                                                               |                | X                                                                                     |                | X                                                                |                | X                                            |                |
| Serreau et al. <sup>21</sup>    | X                                                          |                | X                                                           |                | X                                        |                | X                                                               |                | X                                                                                     |                | X                                                                |                | X                                            |                |
| Toutain & Lejeune <sup>22</sup> | X                                                          |                | X                                                           |                | X                                        |                | X                                                               |                | X                                                                                     |                | X                                                                |                | X                                            |                |
| Urban et al. <sup>23</sup>      | X                                                          |                | X                                                           |                | X                                        |                | X                                                               |                | X                                                                                     |                | X                                                                |                | X                                            |                |
| Urban et al. <sup>24</sup>      | X                                                          |                | X                                                           |                | X                                        |                | X                                                               |                | X                                                                                     |                | X                                                                |                | X                                            |                |

Abbreviation: FASD, fetal alcohol spectrum disorder.

Note. The absence of an "X" means that the respective criterion was "not applicable".

**eTable 4. Prevalence of FASD Among Children and Youth in the General Population by Country and WHO Region in 2012**

| Country                             | Prevalence Estimate (per 1000 Population) | 95% CI Lower | 95% CI Upper |
|-------------------------------------|-------------------------------------------|--------------|--------------|
| <b>African Region</b>               |                                           |              |              |
| Algeria                             | 3.4                                       | 2.0          | 5.2          |
| Angola                              | 9.2                                       | 5.6          | 13.9         |
| Benin                               | 6.2                                       | 3.8          | 9.5          |
| Botswana                            | 4.5                                       | 2.7          | 6.9          |
| Burkina Faso                        | 8.9                                       | 5.5          | 13.5         |
| Burundi                             | 13.0                                      | 8.0          | 19.7         |
| Cameroon                            | 9.9                                       | 6.1          | 15.1         |
| Cape Verde                          | 6.3                                       | 3.9          | 9.7          |
| Central African Republic            | 7.3                                       | 4.4          | 11.1         |
| Chad                                | 5.7                                       | 3.4          | 8.7          |
| Comoros                             | 5.7                                       | 3.4          | 8.7          |
| Congo, Democratic Republic of the   | 7.8                                       | 4.8          | 11.9         |
| Congo, Republic of the              | 5.6                                       | 3.4          | 8.5          |
| Equatorial Guinea                   | 1.7                                       | 1.0          | 2.7          |
| Eritrea                             | 5.8                                       | 3.5          | 8.9          |
| Ethiopia                            | 6.2                                       | 3.7          | 9.5          |
| Gabon                               | 7.0                                       | 4.2          | 10.7         |
| Gambia                              | 7.3                                       | 4.4          | 11.1         |
| Ghana                               | 10.2                                      | 0.0          | 23.2         |
| Guinea                              | 5.7                                       | 3.4          | 8.7          |
| Guinea Bissau                       | 7.0                                       | 4.3          | 10.7         |
| Ivory Coast                         | 7.0                                       | 4.3          | 10.7         |
| Kenya                               | 6.1                                       | 3.7          | 9.3          |
| Lesotho                             | 7.2                                       | 4.4          | 11.0         |
| Liberia                             | 7.9                                       | 4.8          | 12.1         |
| Madagascar                          | 6.1                                       | 3.7          | 9.4          |
| Malawi                              | 6.2                                       | 3.7          | 9.5          |
| Mali                                | 5.6                                       | 3.3          | 8.5          |
| Mauritania                          | 5.2                                       | 3.1          | 8.0          |
| Mauritius                           | 3.6                                       | 2.2          | 5.6          |
| Mozambique                          | 6.6                                       | 4.0          | 10.1         |
| Namibia                             | 11.2                                      | 6.8          | 16.9         |
| Niger                               | 5.8                                       | 3.5          | 8.8          |
| Nigeria                             | 6.4                                       | 0.6          | 13.5         |
| Rwanda                              | 14.2                                      | 8.8          | 21.5         |
| Sao Tome & Principe                 | 7.9                                       | 4.8          | 12.0         |
| Senegal                             | 5.5                                       | 3.3          | 8.4          |
| Seychelles                          | 2.7                                       | 1.6          | 4.1          |
| Sierra Leone                        | 11.6                                      | 7.1          | 17.6         |
| South Africa*                       | 111.1                                     | 71.1         | 158.4        |
| South Sudan                         | 5.5                                       | 3.3          | 8.4          |
| Swaziland                           | 5.7                                       | 3.5          | 8.7          |
| Tanzania, United Republic of        | 11.9                                      | 7.3          | 18.0         |
| Togo                                | 6.4                                       | 3.9          | 9.8          |
| Uganda                              | 16.2                                      | 10.0         | 24.3         |
| Zambia                              | 14.6                                      | 0.2          | 32.0         |
| Zimbabwe                            | 6.5                                       | 3.9          | 9.9          |
| <b>Eastern-Mediterranean Region</b> |                                           |              |              |
| Afghanistan                         | 0.2                                       | 0.0          | 1.7          |

| Country                | Prevalence<br>Estimate (per 1000<br>Population) | 95% CI |       |
|------------------------|-------------------------------------------------|--------|-------|
|                        |                                                 | Lower  | Upper |
| Bahrain                | 0.0                                             | 0.0    | 0.3   |
| Djibouti               | 0.2                                             | 0.0    | 1.8   |
| Egypt                  | 0.1                                             | 0.0    | 1.1   |
| Iran                   | 0.1                                             | 0.0    | 0.9   |
| Iraq                   | 0.1                                             | 0.0    | 0.9   |
| Jordan                 | 0.1                                             | 0.0    | 1.1   |
| Kuwait                 | 0.0                                             | 0.0    | 0.0   |
| Lebanon                | 0.1                                             | 0.0    | 1.0   |
| Libya                  | 0.1                                             | 0.0    | 0.6   |
| Morocco                | 0.2                                             | 0.0    | 1.4   |
| Oman                   | 0.0                                             | 0.0    | 0.2   |
| Pakistan               | 0.2                                             | 0.0    | 1.5   |
| Qatar                  | 0.0                                             | 0.0    | 0.0   |
| Saudi Arabia           | 0.0                                             | 0.0    | 0.1   |
| Somalia                | 0.2                                             | 0.0    | 1.9   |
| Sudan                  | 0.2                                             | 0.0    | 1.9   |
| Tunisia                | 0.1                                             | 0.0    | 1.1   |
| United Arab Emirates   | 0.0                                             | 0.0    | 0.1   |
| Yemen                  | 0.2                                             | 0.0    | 1.6   |
| <b>European Region</b> |                                                 |        |       |
| Albania                | 15.3                                            | 9.7    | 22.6  |
| Armenia                | 14.6                                            | 9.2    | 21.7  |
| Austria                | 10.3                                            | 6.7    | 14.9  |
| Azerbaijan             | 7.4                                             | 4.6    | 11.2  |
| Belarus                | 36.6                                            | 23.7   | 53.2  |
| Belgium                | 11.8                                            | 7.6    | 17.0  |
| Bosnia and Herzegovina | 13.7                                            | 8.6    | 20.6  |
| Bulgaria               | 25.7                                            | 16.7   | 37.2  |
| Croatia*               | 53.3                                            | 30.9   | 81.2  |
| Cyprus                 | 16.3                                            | 10.6   | 23.5  |
| Czech Republic         | 28.5                                            | 18.6   | 41.2  |
| Denmark                | 36.0                                            | 20.1   | 57.6  |
| Estonia                | 28.3                                            | 18.5   | 40.8  |
| Finland                | 12.4                                            | 8.0    | 17.9  |
| France*                | 10.4                                            | 0.0    | 33.7  |
| Georgia                | 18.3                                            | 11.7   | 27.0  |
| Germany                | 20.3                                            | 0.0    | 55.0  |
| Greece                 | 16.6                                            | 10.8   | 24.0  |
| Hungary                | 24.0                                            | 15.7   | 34.6  |
| Iceland                | 7.0                                             | 4.5    | 10.1  |
| Ireland                | 47.5                                            | 28.0   | 73.6  |
| Israel                 | 5.5                                             | 0.0    | 23.5  |
| Italy*                 | 45.0                                            | 35.1   | 56.1  |
| Kazakhstan             | 12.2                                            | 7.8    | 17.9  |
| Kyrgyzstan             | 14.9                                            | 9.3    | 22.3  |
| Latvia                 | 25.4                                            | 16.5   | 36.6  |
| Lithuania              | 19.7                                            | 0.0    | 51.7  |
| Luxembourg             | 1.6                                             | 1.0    | 2.5   |
| Macedonia, Republic of | 13.0                                            | 8.2    | 19.3  |
| Malta                  | 15.8                                            | 10.3   | 22.8  |
| Moldova, Republic of   | 23.3                                            | 14.9   | 34.1  |
| Montenegro             | 16.1                                            | 10.3   | 23.6  |
| Netherlands            | 14.2                                            | 7.6    | 23.1  |

| Country                       | Prevalence<br>Estimate (per 1000<br>Population) | 95% CI |       |
|-------------------------------|-------------------------------------------------|--------|-------|
|                               |                                                 | Lower  | Upper |
| Norway                        | 17.8                                            | 4.1    | 35.2  |
| Poland                        | 19.2                                            | 12.5   | 27.8  |
| Portugal                      | 23.3                                            | 15.2   | 33.6  |
| Romania                       | 22.3                                            | 14.5   | 32.3  |
| Russian Federation            | 28.7                                            | 11.8   | 51.1  |
| Serbia, Republic of           | 21.7                                            | 14.0   | 31.6  |
| Slovakia                      | 19.2                                            | 12.5   | 27.7  |
| Slovenia                      | 21.2                                            | 13.8   | 30.5  |
| Spain                         | 11.8                                            | 1.7    | 24.3  |
| Sweden                        | 7.4                                             | 1.5    | 14.8  |
| Switzerland                   | 25.7                                            | 16.0   | 38.6  |
| Tajikistan                    | 12.1                                            | 7.4    | 18.3  |
| Turkey                        | 5.9                                             | 3.7    | 9.0   |
| Turkmenistan                  | 8.7                                             | 5.4    | 13.1  |
| Ukraine                       | 26.8                                            | 11.6   | 46.9  |
| United Kingdom                | 32.4                                            | 20.0   | 49.0  |
| Uzbekistan                    | 13.2                                            | 8.2    | 19.8  |
| <b>Region of The Americas</b> |                                                 |        |       |
| Antigua and Barbuda           | 7.6                                             | 4.8    | 11.2  |
| Argentina                     | 10.2                                            | 6.5    | 15.0  |
| Bahamas                       | 9.5                                             | 6.0    | 14.0  |
| Barbados                      | 11.5                                            | 7.4    | 17.0  |
| Belize                        | 7.5                                             | 4.8    | 11.0  |
| Bolivia                       | 8.3                                             | 5.3    | 12.1  |
| Brazil                        | 12.0                                            | 6.5    | 19.5  |
| Canada                        | 7.9                                             | 2.8    | 14.5  |
| Chile                         | 8.3                                             | 5.3    | 12.3  |
| Colombia                      | 7.1                                             | 4.6    | 10.4  |
| Costa Rica                    | 6.5                                             | 4.2    | 9.6   |
| Cuba                          | 3.8                                             | 2.4    | 5.5   |
| Dominica                      | 11.5                                            | 7.4    | 16.8  |
| Dominican Republic            | 9.5                                             | 6.1    | 13.9  |
| Ecuador                       | 7.0                                             | 4.5    | 10.2  |
| El Salvador                   | 6.5                                             | 4.2    | 9.6   |
| Grenada                       | 18.4                                            | 11.7   | 27.0  |
| Guatemala                     | 5.1                                             | 3.3    | 7.5   |
| Guyana                        | 14.3                                            | 9.2    | 20.9  |
| Haiti                         | 11.7                                            | 7.6    | 17.1  |
| Honduras                      | 8.4                                             | 5.4    | 12.3  |
| Jamaica                       | 7.4                                             | 4.7    | 10.8  |
| Mexico                        | 1.0                                             | 0.0    | 2.4   |
| Nicaragua                     | 7.0                                             | 4.5    | 10.3  |
| Panama                        | 9.2                                             | 5.9    | 13.5  |
| Paraguay                      | 14.1                                            | 9.1    | 20.6  |
| Peru                          | 9.8                                             | 6.3    | 14.3  |
| Puerto Rico                   | 2.7                                             | 1.7    | 4.0   |
| St Kitts and Nevis            | 7.5                                             | 4.8    | 11.0  |
| St Lucia                      | 17.2                                            | 11.0   | 25.2  |
| St Vincent and Grenadines     | 11.7                                            | 7.5    | 17.2  |
| Suriname                      | 8.0                                             | 5.1    | 11.7  |
| Trinidad and Tobago           | 4.4                                             | 2.8    | 6.6   |
| United States of America*     | 15.2                                            | 7.5    | 25.3  |



| Country                       | Prevalence<br>Estimate (per 1000<br>Population) | 95% CI |       |
|-------------------------------|-------------------------------------------------|--------|-------|
|                               |                                                 | Lower  | Upper |
| Uruguay                       | 6.9                                             | 4.4    | 10.1  |
| Venezuela                     | 7.8                                             | 5.0    | 11.5  |
| <b>South-East Asia Region</b> |                                                 |        |       |
| Bangladesh                    | 1.6                                             | 0.0    | 9.0   |
| Bhutan                        | 1.3                                             | 0.0    | 7.3   |
| India                         | 1.5                                             | 0.0    | 8.5   |
| Indonesia                     | 1.2                                             | 0.0    | 6.6   |
| Maldives                      | 1.1                                             | 0.0    | 6.2   |
| Myanmar                       | 1.5                                             | 0.0    | 8.5   |
| Nepal                         | 1.7                                             | 0.0    | 9.3   |
| Sri Lanka                     | 1.2                                             | 0.0    | 6.7   |
| Thailand                      | 1.1                                             | 0.0    | 6.1   |
| Timor-Leste                   | 1.7                                             | 0.0    | 9.3   |
| <b>Western Pacific Region</b> |                                                 |        |       |
| Australia*                    | 0.6                                             | 0.0    | 2.8   |
| Brunei Darussalam             | 0.4                                             | 0.2    | 0.5   |
| Cambodia                      | 12.1                                            | 7.6    | 18.1  |
| China                         | 5.1                                             | 1.6    | 9.6   |
| Fiji                          | 8.9                                             | 5.5    | 13.4  |
| Japan                         | 6.3                                             | 3.2    | 10.4  |
| Kiribati                      | 11.0                                            | 6.8    | 16.5  |
| Korea, Republic of            | 16.9                                            | 7.7    | 29.0  |
| Laos                          | 15.7                                            | 10.0   | 23.2  |
| Malaysia                      | 4.2                                             | 2.6    | 6.3   |
| Marshall Islands              | 9.7                                             | 6.0    | 14.7  |
| Micronesia                    | 10.7                                            | 6.6    | 16.0  |
| Mongolia                      | 13.7                                            | 8.8    | 20.2  |
| New Zealand                   | 21.0                                            | 12.0   | 33.1  |
| Palau                         | 12.0                                            | 7.7    | 17.5  |
| Papua New Guinea              | 11.6                                            | 7.3    | 17.5  |
| Philippines                   | 13.1                                            | 8.3    | 19.3  |
| Samoa                         | 8.9                                             | 5.5    | 13.4  |
| Singapore                     | 0.4                                             | 0.3    | 0.7   |
| Solomon Islands               | 11.0                                            | 6.8    | 16.6  |
| Tonga                         | 9.5                                             | 5.9    | 14.3  |
| Tuvalu                        | 10.6                                            | 6.6    | 15.9  |
| Vanuatu                       | 10.4                                            | 6.4    | 15.6  |
| Viet Nam                      | 9.4                                             | 5.8    | 14.2  |

\*Estimate based on a meta-analysis of the current literature.

Note. Prediction of FASD prevalence for Andorra, Cook Islands, Monaco, Nauru, Niue, North Korea, San Marino, and Syrian Arab Republic was not possible due to the unavailability of data on alcohol use during pregnancy for these countries.

**eTable 5. Pooled Prevalence of FASD Among Children and Youth in the General Population and the Results of the Heterogeneity and Publication Bias Tests by Country and WHO Region**

| Country (WHO Region)          | # of Studies                  | Prevalence (per 1000 Population) | 95% CI |       | Heterogeneity Tests |             |                  | Publication Bias Tests |                     |                           |
|-------------------------------|-------------------------------|----------------------------------|--------|-------|---------------------|-------------|------------------|------------------------|---------------------|---------------------------|
|                               |                               |                                  | Lower  | Upper | I <sup>2</sup> Test | Q Statistic | df (Q Statistic) | p-value (Q Statistic)  | p-value (rank test) | p-value (Regression Test) |
| <b>African Region</b>         |                               |                                  |        |       |                     |             |                  |                        |                     |                           |
| South Africa                  | 6 <sup>4,12,14,17,23,24</sup> | 111.1                            | 71.1   | 158.4 | 96.2%               | 107.1       | 5                | <0.001                 | 0.136               | 0.130                     |
| <b>European Region</b>        |                               |                                  |        |       |                     |             |                  |                        |                     |                           |
| Croatia                       | 2 <sup>18,19</sup>            | 53.3                             | 30.9   | 81.2  | 73.8%               | 3.8         | 1                | 0.051                  | -                   | -                         |
| France                        | 4 <sup>3,6,21,22</sup>        | 10.4                             | 0.0    | 33.7  | 99.7%               | 348.9       | 3                | <0.001                 | 0.333               | <0.001                    |
| Italy                         | 2 <sup>11,13</sup>            | 45.0                             | 35.1   | 56.1  | 0.0%                | 0.3         | 1                | 0.571                  | -                   | -                         |
| <b>Region of The Americas</b> |                               |                                  |        |       |                     |             |                  |                        |                     |                           |
| United States of America      | 6 <sup>2,5,10,15,16,20</sup>  | 15.2                             | 7.5    | 25.3  | 93.5%               | 71.6        | 5                | <0.001                 | 0.272               | 0.240                     |
| <b>Western Pacific Region</b> |                               |                                  |        |       |                     |             |                  |                        |                     |                           |
| Australia                     | 2 <sup>8,9</sup>              | 0.6                              | 0.0    | 2.8   | 99.1%               | 113.2       | 1                | <0.001                 | -                   | -                         |

Abbreviations: df, degrees of freedom; WHO, World Health Organization.

**eTable 6. Comparison of the Prevalence of FASD Among Special Populations, Based on Select Studies, to the Global Prevalence Among Children and Youth in the General Population**

| Reference                        | Country<br>(State/Province/<br>Territory) | Study<br>Period | Population                                                              | Method       | Prevalence of FASD (per 1000<br>Population) |                     |       | Fold<br>Increase <sup>b</sup> |
|----------------------------------|-------------------------------------------|-----------------|-------------------------------------------------------------------------|--------------|---------------------------------------------|---------------------|-------|-------------------------------|
|                                  |                                           |                 |                                                                         |              | Point<br>Estimate                           | 95% CI <sup>a</sup> |       |                               |
|                                  |                                           |                 |                                                                         |              |                                             | Lower               | Upper |                               |
| Fitzpatrick et al. <sup>25</sup> | Australia (Western)                       | 2010-11         | Aboriginal population                                                   | ACA          | 120.4                                       | 65.7                | 197.0 | 15.6                          |
| Strömmland et al. <sup>26</sup>  | Brazil (Recife)                           | n/a             | Children residing in an orphanage                                       | ACA          | 170.2                                       | 100.5               | 261.6 | 22.1                          |
| Fast et al. <sup>27</sup>        | Canada (British Columbia)                 | 1995-96         | Correctional population                                                 | Clinic-based | 233.4                                       | 185.7               | 286.8 | 30.3                          |
| Robinson et al. <sup>28</sup>    | Canada (British Columbia)                 | 1984-85         | Aboriginal population                                                   | ACA          | 189.7                                       | 122.8               | 272.9 | 24.6                          |
| Tenenbaum et al. <sup>29</sup>   | Israel                                    | n/a             | Pre-adoption & foster care children                                     | ACA          | 40.0                                        | 11.0                | 99.3  | 5.2                           |
| De Vries et al. <sup>30</sup>    | South Africa (Western Cape)               | n/a             | Rural population with a low socioeconomic status                        | ACA          | 182.4                                       | 165.1               | 200.6 | 23.7                          |
| Landgren et al. <sup>31</sup>    | Sweden                                    | n/a             | Adoptees from Eastern Europe (Estonia, Latvia, Poland, Romania, Russia) | ACA          | 521.1                                       | 399.2               | 641.2 | 67.7                          |
| Bell & Chimata <sup>32</sup>     | United States of America (Chicago)        | 2013-14         | Psychiatric care population                                             | Clinic-based | 142.4 <sup>c</sup>                          | 115.6               | 172.6 | 18.5                          |
| Chasnoff et al. <sup>33</sup>    | United States of America (Illinois)       | n/a             | Foster and adopted youth referred to a children's mental health centre  | Clinic-based | 285.2                                       | 247.7               | 325.0 | 37.0                          |

Abbreviations: ACA, active case ascertainment; FASD, fetal alcohol spectrum disorder.

<sup>a</sup> Estimated based on an exact binomial distribution.

<sup>b</sup> Compared to the prevalence of FASD among the general population (7.7 per 1,000; 95% CI: 4.9–11.7 per 1,000).

<sup>c</sup> Prevalence of Neurobehavioral Disorder Associated with Prenatal Alcohol Exposure (ND-PAE<sup>34</sup>).

## eMethods. Estimation of the Quotient of the Average Number of Women Who Consumed Alcohol During Pregnancy per 1 Case of FASD

The data on the prevalence of FASD for Australia, Croatia, France, Italy and the United States were linked to data on the prevalence of alcohol use during pregnancy for each respective country. Based on these values, the best estimator for the number of women drinking during their pregnancy that led to one FASD birth ( $N_{drinking\_woman:FASD}$ ) in  $n$  countries is:

$$N_{drinking\_woman:FASD} = \frac{\sum_{i=1}^n P_{drk_i} \cdot N_{births_i}}{\sum_{i=1}^n P_{FASD_i} \cdot N_{births_i}}$$

Where  $P_{drk_i}$  is the prevalence of mothers consuming alcohol during their pregnancy for country  $i$ ,  $N_{births_i}$  the number of births in country  $i$ , and  $P_{FASD_i}$  the prevalence of FASD in country  $i$ . This model assumes that each mother gives birth to one single child.

**eFigure 1. Schematic Diagram Depicting the Search Strategy Used**

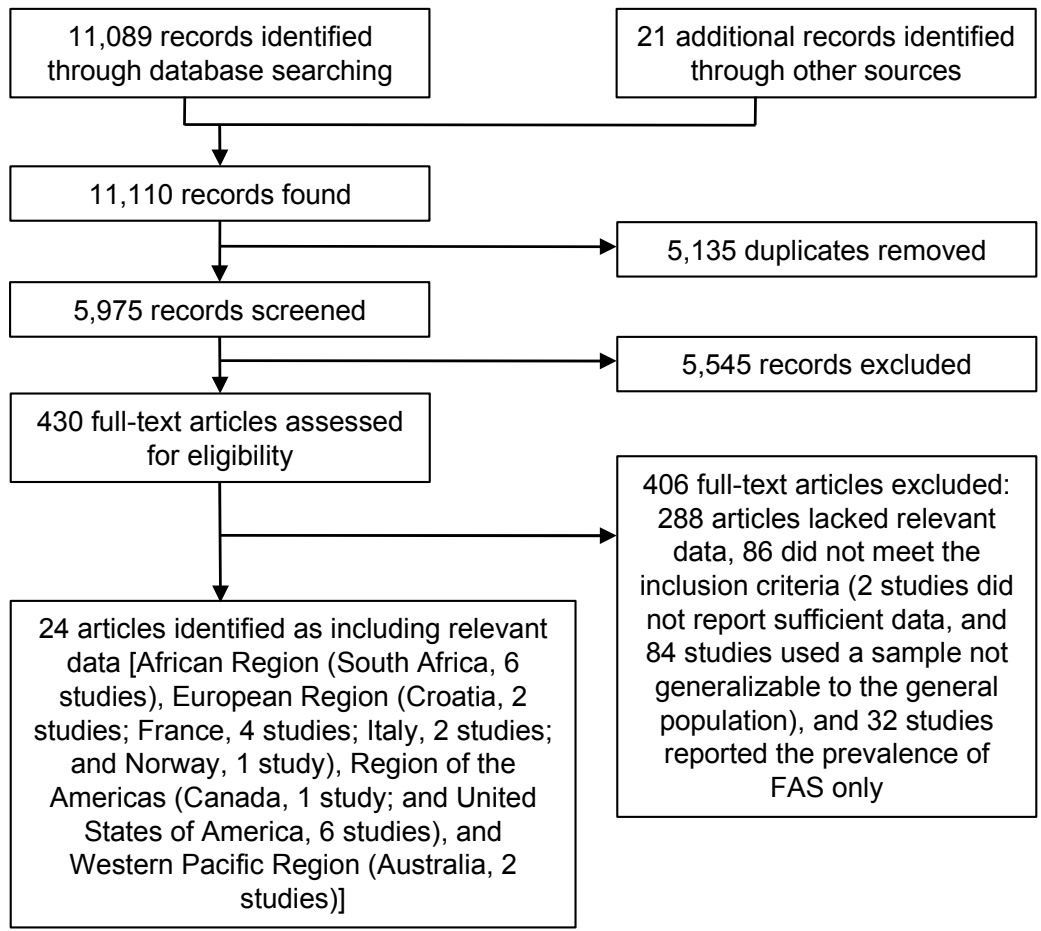

**eFigure 2. Forest Plot of the Prevalence of FASD Among Children and Youth in the General Population in Australia, Croatia, France, Italy, South Africa, and the United States<sup>a</sup>**

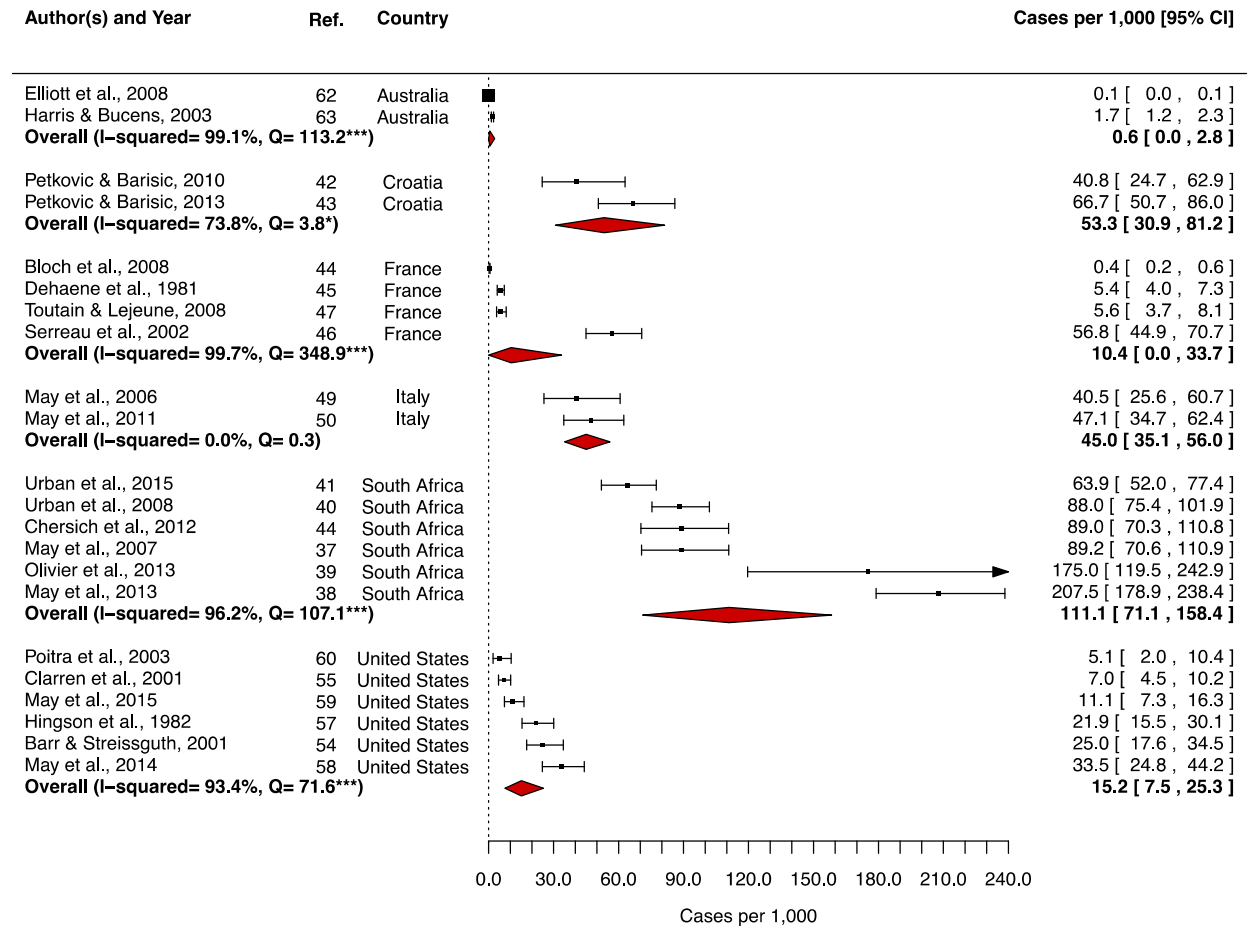

<sup>a</sup> The size of the box around the point estimate is representative of the weight of the estimate used in calculating the aggregated point estimate.

## References

1. Asante KO, Nelms-Maztke J. Report on the survey of children with chronic handicaps and fetal alcohol syndrome in the Yukon and Northwest British Columbia. Whitehorse, YT: Council for Yukon Indians; 1985.
2. Barr HM, Streissguth AP. Identifying maternal self-reported alcohol use associated with fetal alcohol spectrum disorders. *Alcohol Clin Exp Res*. 2001;25(2):283-287.
3. Bloch J, Cans C, de Vigan C, et al. Faisabilité de la surveillance du syndrome d'alcoolisation fœtale [Feasibility of the foetal alcohol syndrome surveillance]. *Arch Pediatr*. 2008;15(5):507-9.
4. Chersich MF, Urban M, Olivier L, Davies LA, Chetty C, Viljoen D. Universal prevention is associated with lower prevalence of fetal alcohol spectrum disorders in Northern Cape, South Africa: a multicentre before–after study. *Alcohol Alcohol*. 2012;47(1):67-74.
5. Clarren SK, Randels SP, Sanderson M, Fineman RM. Screening for fetal alcohol syndrome in primary schools: a feasibility study. *Teratology*. 2001;63(1):3-10.
6. Dehaene P, Crépin G, Delahousse G, et al. Aspects épidémiologiques du syndrome d'alcoolisme fœtal: 45 observations en 3 ans [Epidemiological aspects of the foetal alcoholism syndrome. 45 cases]. *Nouv Presse Med*. 1981;10(32):2639-2643.
7. Elgen I, Bruaroy S, Laegreid LM. Lack of recognition and complexity of foetal alcohol neuroimpairments. *Acta Paediatr*. 2007;96(2):237-241.
8. Elliott E, Payne JM, Morris A, Haan E, Bower C. Fetal alcohol syndrome: a prospective national surveillance study. *Arch Dis Child*. 2008;93(9):732-737.
9. Harris KR, Bucens IK. Prevalence of fetal alcohol syndrome in the top end of the northern territory. *J Paediatr Child Health*. 2003;39(7):528-533.
10. Hingson R, Alpert JJ, Day N, et al. Effects of maternal drinking and marijuana use on fetal growth and development. *Pediatrics*. 1982;70(4):539-546.
11. May PA, Fiorentino DJ, Gossage P, et al. Epidemiology of FASD in a province in Italy: prevalence and characteristics of children in a random sample of schools. *Alcohol Clin Exp Res*. 2006;30(9):1562-1575.
12. May PA, Gossage JP, Marais AS, et al. The epidemiology of fetal alcohol syndrome and partial FAS in a South African community. *Drug Alcohol Depend*. 2007;88(2-3):259-271.
13. May PA, Fiorentino D, Coriale G, et al. Prevalence of children with severe fetal alcohol spectrum disorders in communities near Rome, Italy: new estimated rates are higher than previous estimates. *Int J Environ Res Public Health*. 2011;8(6):2331-2351.
14. May PA, Blankenship J, Marais AS, et al. Approaching the prevalence of the full spectrum of fetal alcohol spectrum disorders in a South African population-based study. *Alcohol Clin Exp Res*. 2013;37(5):818-830.
15. May PA, Baete A, Russo J, et al. Prevalence and characteristics of fetal alcohol spectrum disorders. *Pediatrics*. 2014;134(5):855-866.
16. May PA, Keaster C, Bozeman R, et al. Prevalence and characteristics of fetal alcohol syndrome and partial fetal alcohol syndrome in a Rocky Mountain Region City. *Drug Alcohol Depend*. 2015;155:118-127.
17. Olivier L, Urban M, Chersich M, Temmerman M, Viljoen D. Burden of fetal alcohol syndrome in a rural West Coast area of South Africa. *S Afr Med J*. 2013;103(6):402-405.
18. Petković G, Barišić I. FAS prevalence in a sample of urban schoolchildren in Croatia. *Reprod Toxicol*. 2010;29(2):237-241.
19. Petković G, Barišić I. Prevalence of fetal alcohol syndrome and maternal characteristics in a sample of schoolchildren from a rural province of Croatia. *Int J Environ Res Public Health*. 2013;10(4):1547-1561.
20. Poitra BA, Marion SD, Dionne M, et al. A school-based screening program for fetal alcohol syndrome. *Neurotoxicol Teratol*. 2003;25(6):725-729.
21. Serreau R, Maillard T, Verdier R, et al. Étude clinique et prévalence du syndrome d'alcoolisation fœtale pris en charge dans les établissements médicosociaux de l'île de la Réunion [Clinical study and prevalence of fetal alcohol syndrome in medico-social institutions of the Reunion Island]. *Arch Pediatr*. 2002;9(1):14-20.
22. Toutain S, Lejeune C. Family management of infants with Fetal Alcohol Syndrome or Fetal Alcohol Spectrum disorders. *J Dev Phys Disabil*. 2008;20:425-436.
23. Urban M, Chersich MF, Fourie LA, Chetty C, Olivier L, Viljoen D. Fetal alcohol syndrome among grade 1 schoolchildren in Northern Cape Province: prevalence and risk factors. *S Afr Med J*. 2008;98(11):877-882.
24. Urban MF, Olivier L, Viljoen D, et al. Prevalence of fetal alcohol syndrome in a South African City with a predominantly black African population. *Alcohol Clin Exp Res*. 2015;39(6):1016-1026.

25. Fitzpatrick JP, Latimer J, Carter M, et al. Prevalence of fetal alcohol syndrome in a population-based sample of children living in remote Australia: The Lililwan\* Project. *J Pediatr Child Health*. 2015;51(4):450-457.
26. Strömmland K, Venture LO, Mirzaei L, et al. Fetal alcohol spectrum disorders among children in a Brazilian orphanage. *Birth Defects Res A Clin Mol Teratol*. 2015;103(3):178-185.
27. Fast DK, Conry J, Looock CA. Identifying fetal alcohol syndrome among youth in the criminal justice system. *J Dev Behav Pediatr*. 1999;20(5):370-372.
28. Robinson GC, Conry JL, Conry RF. Clinical profile and prevalence of fetal alcohol syndrome in an isolated community in British Columbia. *CMAJ*. 1987;137(3):203-207.
29. Tenenbaum A, Hertz P, Dor T, Castiel Y, Sapir A, Wexler ID. Fetal alcohol spectrum disorder in Israel: Increased prevalence in an at-risk population. *Isr Med Assoc J*. 2011;13(12):725-729.
30. de Vries MM, Marais AS, Buckley D. Epidemiology of fetal alcohol spectrum disorders in rural communities in South Africa: Prevalence, child characteristics, and maternal risk factors. *Alcohol Clin Exp Res*. 2014;38(s1):251A.
31. Landgren M, Svensson L, Strömmland K, Andersson Grönland M. Prenatal alcohol exposure and neurodevelopmental disorders in children adopted from eastern Europe. *Pediatrics*. 2010;125(5):1178-1185.
32. Bell CC, Chimata R. Prevalence of neurodevelopmental disorders among low-income African Americans at a clinic on Chicago's south side. *Psychiatr Serv*. 2015;66(5):539-542.
33. Chasnoff IJ, Wells AM, King L. Misdiagnosis and missed diagnoses in foster and adopted children with prenatal alcohol exposure. *Pediatrics*. 2015;135(2):264-270.
34. American Psychiatric Association. Diagnostic and statistical manual of mental disorders, 5th edition: DSM-5. Washington, DC: American Psychiatric Association; 2013.
